# Supplementary material for: Self-injury from early adolescence to early adulthood: age-related course, recurrence, and services use in males and females from the community
Source: PubMed Central journal article supplement (PMC8140957; doi:10.1007/s00787-020-01573-w), 2020-06-22
Supplement: 787_2020_1573_MOESM1_ESM.pdf [file 787_2020_1573_MOESM1_ESM.pdf]

## Online Supplement

### **Self-injury from early adolescence to early adulthood: Age-related course, recurrence, and services use in males and females from the community**

Annekatriin Steinhoff, Ph.D., Denis Ribeaud, Ph.D., Stephan Kupferschmid, M.D., Nesrin Raible-Destan, Ph.D., Boris B. Quednow, Ph.D., Urs Hepp, M.D., Manuel Eisner, Ph.D., & Lilly Shanahan, Ph.D.

#### **Corresponding author:**

Annekatriin Steinhoff, Jacobs Center for Productive Youth Development, University of Zurich, Andreasstrasse 15, 8050 Zurich, Switzerland. E-Mail: [steinhoff@jacobscenter.uzh.ch](mailto:steinhoff@jacobscenter.uzh.ch), phone: +41 44 634 06 92

### A) Migration background of participants

Parental immigration background originates in > 80 different countries. Figure A1 shows the seven most frequent countries of birth; several of the countries reflect immigration waves into Switzerland due to specific events such as wars and humanitarian crises.

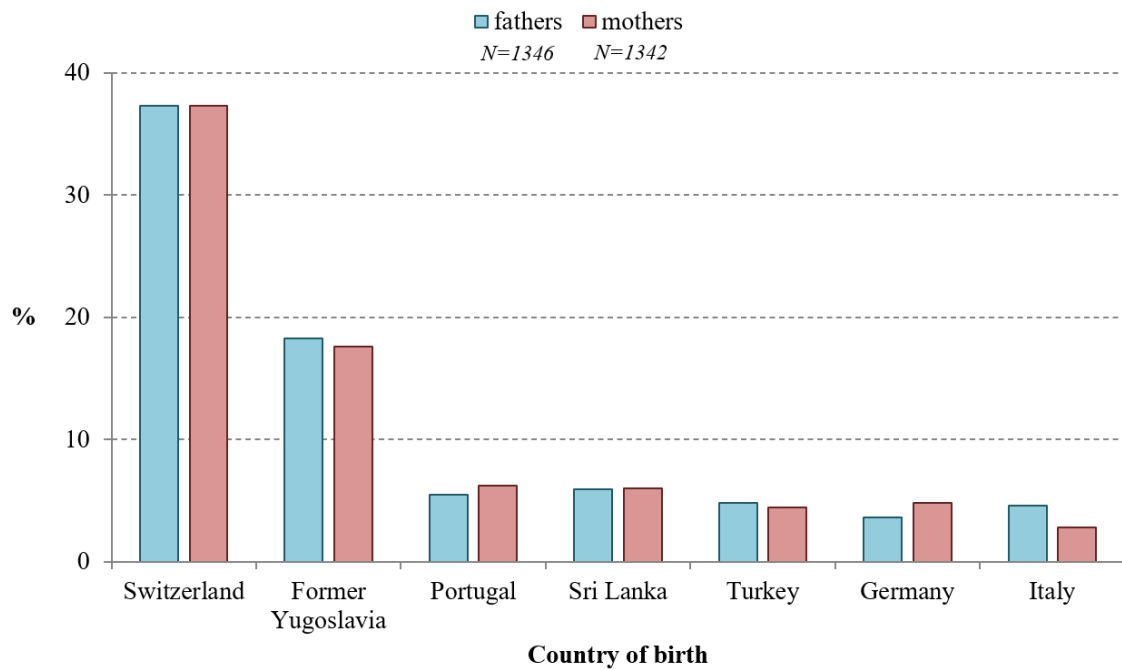

Figure A1. Country of birth of the participants' parents

**B) Associations between self-injury and internalizing symptoms and between self-injury and suicidal ideation**

Self-injury was associated with internalizing symptoms in our sample (Table B1).

**Table B1. Internalizing symptoms mean comparison between adolescents with and without self-injury (ANOVA)**

|               | With self-injury<br>M (SD) | Without self-injury<br>M (SD) | <i>p</i> for group<br>difference |
|---------------|----------------------------|-------------------------------|----------------------------------|
| <b>Age 13</b> | 2.81 (0.83)                | 2.10 (0.66)                   | < 0.001                          |
| <b>Age 15</b> | 3.06 (0.82)                | 2.24 (0.72)                   | < 0.001                          |
| <b>Age 17</b> | 3.30 (0.79)                | 2.32 (0.75)                   | < 0.001                          |
| <b>Age 20</b> | 3.45 (0.91)                | 2.31 (0.75)                   | < 0.001                          |

Self-injury was also associated with suicidal ideation, which was assessed at ages 15, 17, and 20 (Table B2).

**Table B2. Prevalence of suicidal ideations among adolescents with and without self-injury and logistic regression of suicidal ideations on self-injury**

|               | With self-injury<br>(%) | Without self-injury<br>(%) | OR   | 95% CI     | <i>p</i> |
|---------------|-------------------------|----------------------------|------|------------|----------|
| <b>Age 15</b> | 55.2                    | 15.1                       | 6.92 | 4.91–9.75  | < 0.001  |
| <b>Age 17</b> | 68.0                    | 17.6                       | 9.92 | 6.62–14.87 | < 0.001  |
| <b>Age 20</b> | 63.5                    | 15.8                       | 9.29 | 5.94–14.51 | < 0.001  |

### C) Point prevalence in services use

*Overall.* We examined both retrospective reports of services use (i.e., reported use of services in the two/three years *before* the interview when self-injury was reported) and prospective rates (i.e., service use *after* the self-injury assessment). The retrospective reports showed that point prevalence of services use in adolescents with self-injury increased from ages 13 to 20 (Figure C1). At each assessment, adolescents with self-injury were more likely to have used services than those without self-injury; this gap widened after mid-adolescence (age 13: OR = 2.02, 95% CI = 1.45–2.80,  $p < 0.001$ ; age 15: OR = 1.99, 95% CI = 1.43–2.78,  $p < 0.001$ ; age 17: OR = 3.88, 95% CI = 2.65–5.67,  $p < 0.001$ ; age 20: OR 3.06, 95% CI = 2.00–4.69,  $p < 0.001$ ). With respect to types of services used, 13- and 15-year-olds with self-injury were most likely to have used school-based services. Beginning at age 17, they more commonly reported having seen clinical psychologists or psychiatrists. Prospective rates of services use (i.e., services use reported two/three years *after* the self-injury assessment) were similar, with the exception of a non-significant difference between youth with and without self-injury at age 17 with regard to school-related services use until age 20.

During late adolescence and early adulthood (i.e., at ages 17 and 20), youth with self-injury were significantly more likely than their peers without self-injury to have been admitted to a psychiatric hospital (13.5% vs. 1.3%, OR = 12.04, 95% CI = 5.85–24.77,  $p < 0.001$  at age 17; 24% vs. 2.2%, OR = 13.92, 95% CI = 7.49–25.85,  $p < 0.001$  at age 20). Differences in the point prevalence of any hospital admission between those with and those without self-injury were marginally significant at ages 15 and 17 only ( $p = 0.18$ ,  $p = 0.067$ ,  $p = 0.050$ ,  $p = 0.26$  for the group difference at ages 13, 15, 17, and 20, respectively, with youth with self-injury being slightly more likely to be hospitalized: OR = 1.49, 95% CI = 0.97–2.29 at age 15; OR = 1.62, 95% CI = 1.00–2.64 at age 17).

*Sex differences.* Females with self-injury were marginally more likely to have seen a mental health care provider compared to males with self-injury at ages 15 and 20 (Figure C1). At age 17, females with self-injury were more likely than males with self-injury to have seen a clinician. No sex difference emerged in the point prevalence of admission to a psychiatric hospital. However, at age 17, females with current self-injury were more likely than males to have spent several days in hospital (23.6% vs. 5.4%, OR = 5.40, 95% CI = 1.20–24.38,  $p = 0.028$ ).

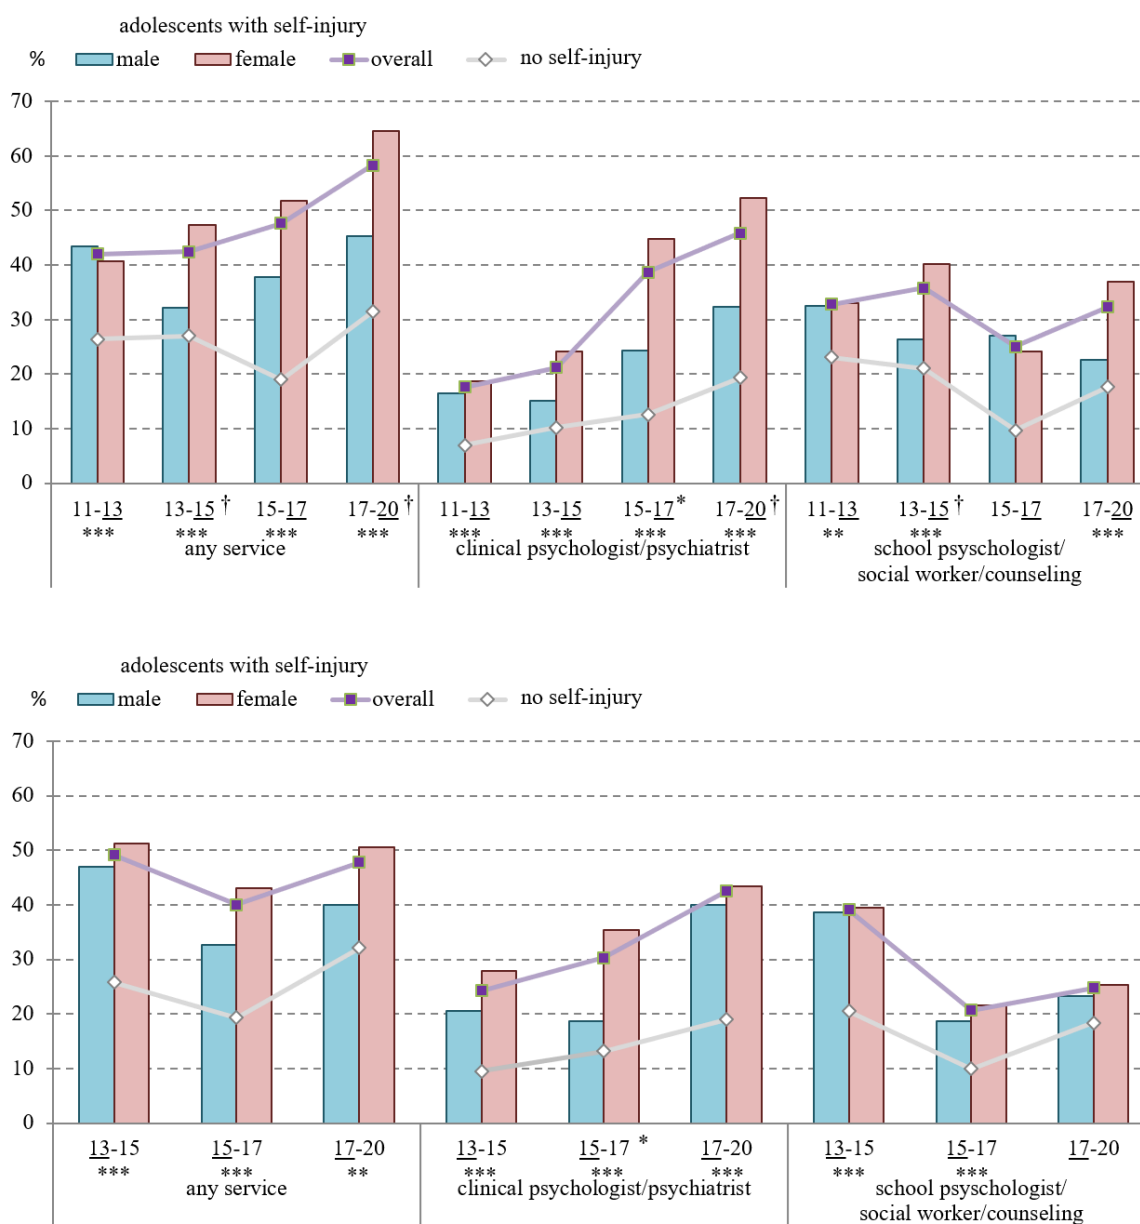

Figure C1. Overall and sex-specific prevalence of services use during the previous two years among adolescents who had or had not self-injured in the previous month.

Top: Retrospective reports (services use during the two years before self-injury assessment)

Bottom: Prospective reports (services use during the two years after self-injury assessment)

Note. Age at self-injury assessment is underlined; p-values for sex differences are next to the ages on the x-axis, while p-values for differences between adolescents with and without self-injury are below the ages on the x-axis †  $p < 0.10$ , \*  $p < 0.05$ , \*\*  $p < 0.01$ , \*\*\*  $p < 0.001$

### **Point prevalence of reasons for services use**

*Overall.* When examining the point prevalence of reasons for services use among adolescents with self-injury at individual ages, self-harm often did not emerge as the most common reason for having seen a health care provider (Tables C1–C4). At age 13, family problems and attention problems were the most common reasons. From age 15 onwards, depressive symptoms, self-injury, and suicidal thoughts became more common reasons.

*Sex differences.* During mid-adolescence, females with self-injury reported use of professional services because of depressive symptoms, self-injury, and suicidal thoughts more often than males at the statistical trend level (Tables C1–C4). Males with self-injury at age 13 reported attention deficit problems and learning difficulties as reasons for use of mental health services more often than females with self-injury. With respect to social relationships, family problems were the most salient reasons for seeking help among adolescents with self-injury, particularly females, at all assessments. From mid-adolescence onwards, females with self-injury more commonly reported victimization experiences as a reason for services use than males. In contrast, early adolescent males more often reported using services because they had offended others (e.g., violent offense or bullying).

**Table C1. Trends and sex differences in the reasons for services use among adolescents with self-injury at age 13**

|                                          | <b>Overall %</b> | <b>Male %</b> | <b>Female %</b> | <b>p for sex difference</b> |
|------------------------------------------|------------------|---------------|-----------------|-----------------------------|
| <b>Retrospective</b>                     | <b>n = 73</b>    | <b>n = 36</b> | <b>n = 37</b>   |                             |
| Depression/self-injury/suicidal thoughts | 15.1             | < 13.9        | 21.6            | 0.11                        |
| Attention/concentration problems         | 19.2             | 30.6          | < 13.5          | 0.015                       |
| Learning difficulties                    | 13.7             | 22.2          | < 13.5          | 0.037                       |
| Substance use                            | -                | -             | -               | -                           |
| Family problems                          | 34.2             | 27.8          | 40.5            | 0.25                        |
| Problems with teacher                    | 13.7             | 13.9          | 13.5            | 0.96                        |
| Victimization                            | 12.3             | < 13.9        | 16.2            | 0.31                        |
| Perpetration of violence or bullying     | 8.2              | 13.9          | < 13.5          | 0.082                       |
| <b>Prospective</b>                       | <b>n = 83</b>    | <b>n = 39</b> | <b>n = 44</b>   |                             |
| Depression/self-injury/suicidal thoughts | 14.5             | < 12.8        | 22.7            | 0.023                       |
| Attention/concentration problems         | 15.7             | 20.5          | 11.4            | 0.25                        |
| Learning difficulties                    | 13.3             | 15.4          | 11.4            | 0.59                        |
| Substance use                            | 8.4              | < 12.8        | 11.4            | 0.31                        |
| Family problems                          | 34.9             | 25.6          | 43.2            | 0.094                       |
| Problems with teacher                    | 7.2              | 12.8          | < 11.4          | 0.064                       |
| Victimization                            | 9.6              | < 12.8        | 13.6            | 0.19                        |
| Perpetration of violence or bullying     | 9.6              | 15.4          | < 11.4          | 0.095                       |

*Note.* Retrospective reports relate to services use during the two/three years before the interview when past-month self-injury was assessed, which results in some overlap in timeframes, whereas prospective reports relate to services use during the two/three years after the interview when past-month self-injury was assessed, which does not result in an overlap in timeframes.

**Table C2. Trends and sex differences in the reasons for services use among adolescents with self-injury at age 15**

|                                          | <b>Overall %</b> | <b>Male %</b> | <b>Female %</b> | <b>p for sex difference</b> |
|------------------------------------------|------------------|---------------|-----------------|-----------------------------|
| <b>Retrospective</b>                     | <b>n = 70</b>    | <b>n = 17</b> | <b>n = 53</b>   |                             |
| Depression/self-injury/suicidal thoughts | 21.4             | < 29.4        | 26.4            | 0.073                       |
| Attention/concentration problems         | 10.0             | < 29.4        | 9.4             | 0.78                        |
| Learning difficulties                    | 10.0             | < 29.4        | 9.4             | 0.78                        |
| Substance use                            | < 7.1            | -             | < 9.4           | 0.42                        |
| Family problems                          | 44.3             | 41.2          | 45.3            | 0.77                        |
| Problems with teacher                    | < 7.1            | -             | < 9.4           | 0.57                        |
| Victimization                            | 12.9             | -             | 17.0            | 0.069                       |
| Perpetration of violence or bullying     | 8.6              | < 29.4        | < 9.4           | 0.59                        |
| <b>Prospective</b>                       | <b>n = 58</b>    | <b>n = 14</b> | <b>n = 44</b>   |                             |
| Depression/self-injury/suicidal thoughts | 37.9             | < 35.7        | 43.2            | 0.14                        |
| Attention/concentration problems         | 10.3             | < 35.7        | < 11.4          | 0.58                        |
| Learning difficulties                    | 13.8             | < 35.7        | 13.6            | 0.95                        |
| Substance use                            | -                | -             | -               | -                           |
| Family problems                          | 34.5             | < 35.7        | 38.6            | 0.24                        |
| Problems with teacher                    | 10.3             | < 35.7        | < 11.4          | 0.58                        |
| Victimization                            | 13.8             | < 35.7        | 13.6            | 0.95                        |
| Perpetration of violence or bullying     | -                | -             | -               | -                           |

Note. Retrospective reports relate to services use during the two/three years before the interview when past-month self-injury was assessed, which results in some overlap in timeframes, whereas prospective reports relate to services use during the two/three years after the interview when past-month self-injury was assessed, which does not result in an overlap in timeframes.



**Table C3. Trends and sex differences in the reasons for services use among adolescents with self-injury at age 17**

|                                          | Overall %     | Male %        | Female %      | p for sex difference |
|------------------------------------------|---------------|---------------|---------------|----------------------|
| <b>Retrospective</b>                     | <b>n = 59</b> | <b>n = 14</b> | <b>n = 45</b> |                      |
| Depression/self-injury/suicidal thoughts | 44.1          | < 35.7        | 51.1          | 0.051                |
| Attention/concentration problems         | 13.6          | < 35.7        | 15.6          | 0.42                 |
| Learning difficulties                    | 16.9          | < 35.7        | 20.0          | 0.26                 |
| Substance use                            | < 8.5         | < 35.7        | < 11.1        | 0.073                |
| Family problems                          | 23.7          | -             | 31.1          | 0.017                |
| Problems with teacher                    | 10.2          | < 35.7        | < 11.1        | 0.56                 |
| Victimization                            | 10.2          | -             | 13.3          | 0.15                 |
| Perpetration of violence or bullying     | < 8.5         | < 35.7        | -             | 0.071                |
| <b>Prospective</b>                       | <b>n = 54</b> | <b>n = 12</b> | <b>n = 42</b> |                      |
| Depression/self-injury/suicidal thoughts | 63.0          | 50.0          | 66.7          | 0.29                 |
| Attention/concentration problems         | 14.8          | < 41.7        | 11.9          | 0.26                 |
| Learning difficulties                    | 14.8          | < 41.7        | 14.3          | 0.84                 |
| Substance use                            | 9.3           | < 41.7        | < 11.9        | 0.32                 |
| Family problems                          | 27.8          | < 41.7        | 31.0          | 0.33                 |
| Problems with teacher                    | < 9.3         | -             | < 11.9        | 0.44                 |
| Victimization                            | < 9.3         | -             | < 11.9        | 0.27                 |
| Perpetration of violence or bullying     | -             | -             | -             | -                    |

*Note.* Retrospective reports relate to services use during the two/three years before the interview when past-month self-injury was assessed, which results in some overlap in timeframes, whereas prospective reports relate to services use during the two/three years after the interview when past-month self-injury was assessed, which does not result in an overlap in timeframes.

**Table C4. Trends and sex differences in the reasons for services use among adolescents with self-injury at age 20**

|                                          | Overall %     | Male %        | Female %      | p for sex difference |
|------------------------------------------|---------------|---------------|---------------|----------------------|
| <b>Retrospective</b>                     | <b>n = 56</b> | <b>n = 14</b> | <b>n = 42</b> |                      |
| Depression/self-injury/suicidal thoughts | 57.1          | 50.0          | 59.5          | 0.53                 |
| Attention/concentration problems         | 16.1          | < 35.7        | 16.7          | 0.83                 |
| Learning difficulties                    | 16.1          | < 35.7        | 14.3          | 0.53                 |
| Substance use                            | < 8.9         | < 35.7        | < 11.9        | > 0.99               |
| Family problems                          | 32.1          | < 35.7        | 38.1          | 0.099                |
| Problems with teacher                    | < 8.9         | < 35.7        | < 11.9        | > 0.99               |
| Victimization                            | 17.9          | < 35.7        | 21.4          | 0.23                 |
| Perpetration of violence of bullying     | < 8.9         | < 35.7        | < 11.9        | 0.41                 |

*Note.* Retrospective reports relate to services use during the two/three years before the interview when past-month self-injury was assessed, resulting in so some overlap in timeframes.
